# Supplementary material for: Single-atom cobalt encapsulated in carbon nanotubes as an effective catalyst for enhancing sulfur conversion in lithium–sulfur batteries
Source: Royal Society of Chemistry journal article supplement (doi:10.1039/d3me00191a), 2024-01-01
Supplement: d3me00191a1.pdf [file d3me00191a1.pdf]

## Single-Atom Cobalt Encapsulated in Carbon Nanotubes as an Effective Catalyst for Enhancing Sulfur Conversion in Lithium-Sulfur Batteries

### Theoretical computations

The VASP software was utilized for quantum density functional theory (DFT) investigations to determine the binding energy ( $E_b$ ) between substrates and  $\text{Li}_2\text{S}_n$  ( $n=1, 2, 4, 6, 8$ ). The binding energy was estimated using the following equation:

$$E_b = E_{\text{Li}_2\text{S}_n + \text{substrate}} - E_{\text{Li}_2\text{S}_n} - E_{\text{substrate}}$$

The energy of  $\text{Li}_2\text{S}_n$ , substrate, and  $\text{Li}_2\text{S}_n$ -substrates are respectively associated with  $E_b$ ,  $E_{\text{substrate}}$ , and  $E_{\text{Li}_2\text{S}_n + \text{substrate}}$ .

We performed calculations for each LiPS and catalyst combination using a minimum of 10 distinct initial configurations in order to determine the most favorable total SCF energy. Due to the presence of Co atoms as catalysts, we utilized unrestricted Kohn-Sham DFT to accurately represent the open-shell system. The exchange-correlation potential was chosen to be the extended gradient approximation, as proposed by Perdew, Burke, and Ernzerhof. The plane wave's cut-off energy was established at 400 eV. The energy threshold for the iterative solution of the Kohn-Sham equation was established at  $10^{-5}$  eV. The structures were relaxed until the residual stresses on the atoms decreased to below  $0.05 \text{ eV } \text{\AA}^{-1}$ . The weak interaction was characterized using the DFT+D3 approach, which incorporates an empirical correction based on Grimme's scheme. The vacuum space was adjusted to a size greater than  $15 \text{ \AA}$ , ensuring that there was no contact between periodic pictures. The Brillouin zones of Co[0001] materials and  $\text{CoN}_4$  materials were sampled using a  $3 \times 3 \times 1$  k points grid. An ascending-nudged elastic band approach was employed to ascertain the minimum energy pathway for the transitional state scanning process.

| Table S1. EXAFS fitting parameters at the Co K-edge for various samples |       |                |                    |                                                                 |                                   |             |
|-------------------------------------------------------------------------|-------|----------------|--------------------|-----------------------------------------------------------------|-----------------------------------|-------------|
| Sample                                                                  | Shell | N <sup>a</sup> | R (Å) <sup>b</sup> | σ <sup>2</sup> (Å <sup>2</sup> ·10 <sup>-3</sup> ) <sup>c</sup> | ΔE <sub>0</sub> (eV) <sup>d</sup> | R factor(%) |
| COSAC@CNT                                                               | Co-N  | 4.5            | 1.91               | 9.8                                                             | -6.0                              | 0.6         |
| CONP@CNT                                                                | CO-CO | 8.7            | 2.51               | 6.3                                                             | 5.9                               | 0.2         |

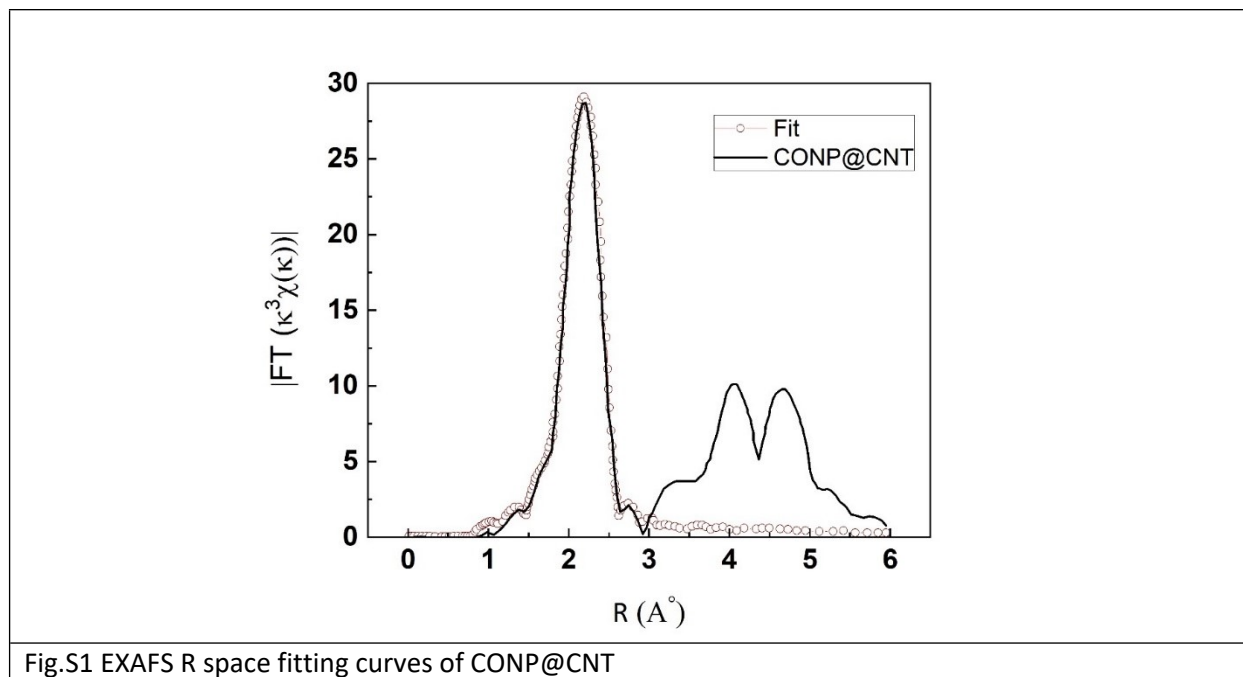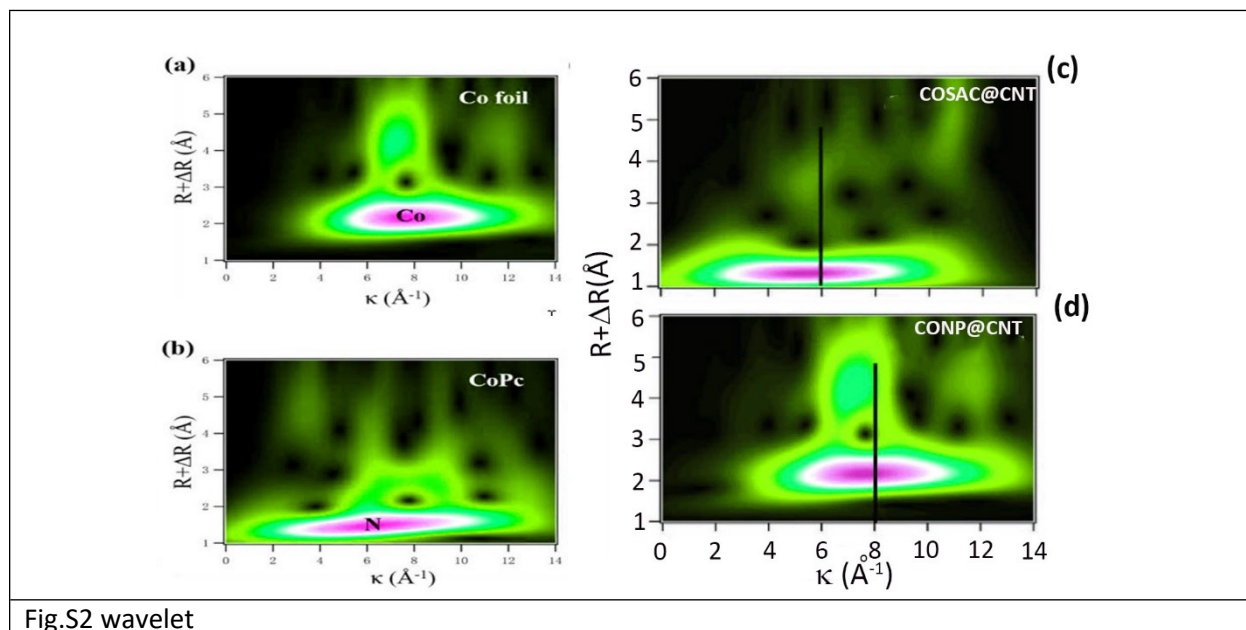

transform (FT) of (a) Co foil, (b) Co PC (c) CoSAC@CNT and (d) CoNP@CNT.

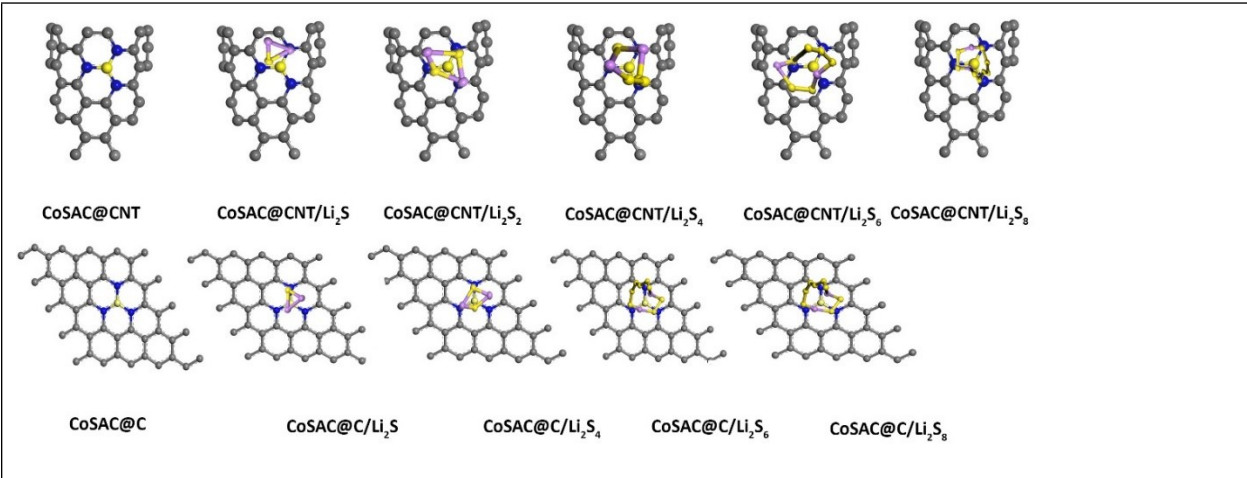

Fig.S3 Optimized LiPS structures on CNT and plain carbon sheet

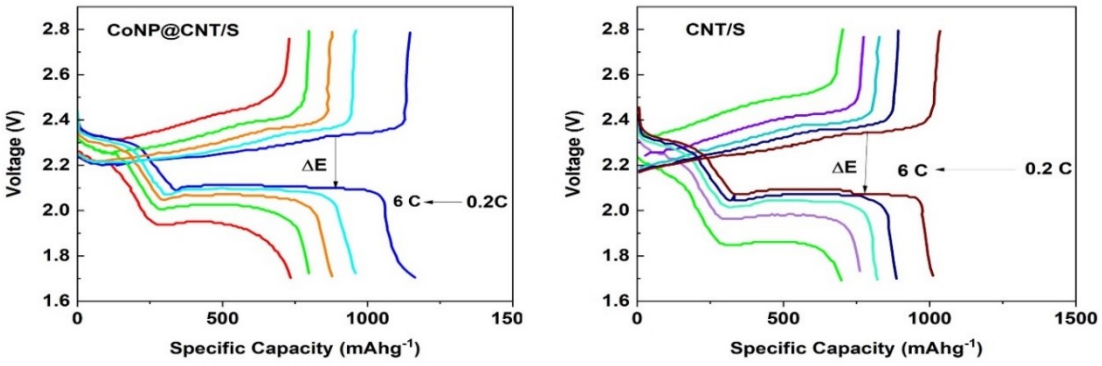

Fig.S4 Co/NGDY and NGDY electrodes charge/discharge profiles captured at 0.2 C , , 1, 2, 3.6 C, and 3.6 C.
